# Supplementary material for: Decoupled ion mobility in nano-confined ionic plastic crystal
Source: Royal Society of Chemistry journal article supplement (doi:10.1039/d0ma00778a), 2020-01-01
Supplement: d0ma00778a1.pdf [file d0ma00778a1.pdf]

## Decoupled ion mobility in nano-confined ionic plastic crystal

Haijin Zhu<sup>a,b,\*</sup>, Aleksandra Grzelak<sup>a,b</sup>, Ruhamah Yunis<sup>c</sup>, Jaime Martín<sup>d,e</sup> and Maria Fosyth<sup>a,b,e</sup>

<sup>a</sup> Institute for Frontier Materials, Deakin University, Geelong VIC 3216, Australia

<sup>b</sup> ARC Centre of Excellence for Electromaterials Science, Deakin University, 221 Burwood Highway, Burwood, Victoria 3125, Australia.

<sup>c</sup> Centre for Materials Science, School of Chemistry and Physics, Queensland University of Technology, 2 George Street, Brisbane, Queensland, 4000, Australia.

<sup>d</sup> POLYMAT and Polymer Science and Technology Department, Faculty of Chemistry, University of the Basque Country UPV/EHU, Manuel de Lardizabal 3, 20018 Donostia-San Sebastian, Spain

<sup>e</sup> Ikerbasque, Basque Foundation for Science, 48013 Bilbao, Spain

\* Corresponding Author

Email: [h.zhu@deakin.edu.au](mailto:h.zhu@deakin.edu.au) (H Zhu);

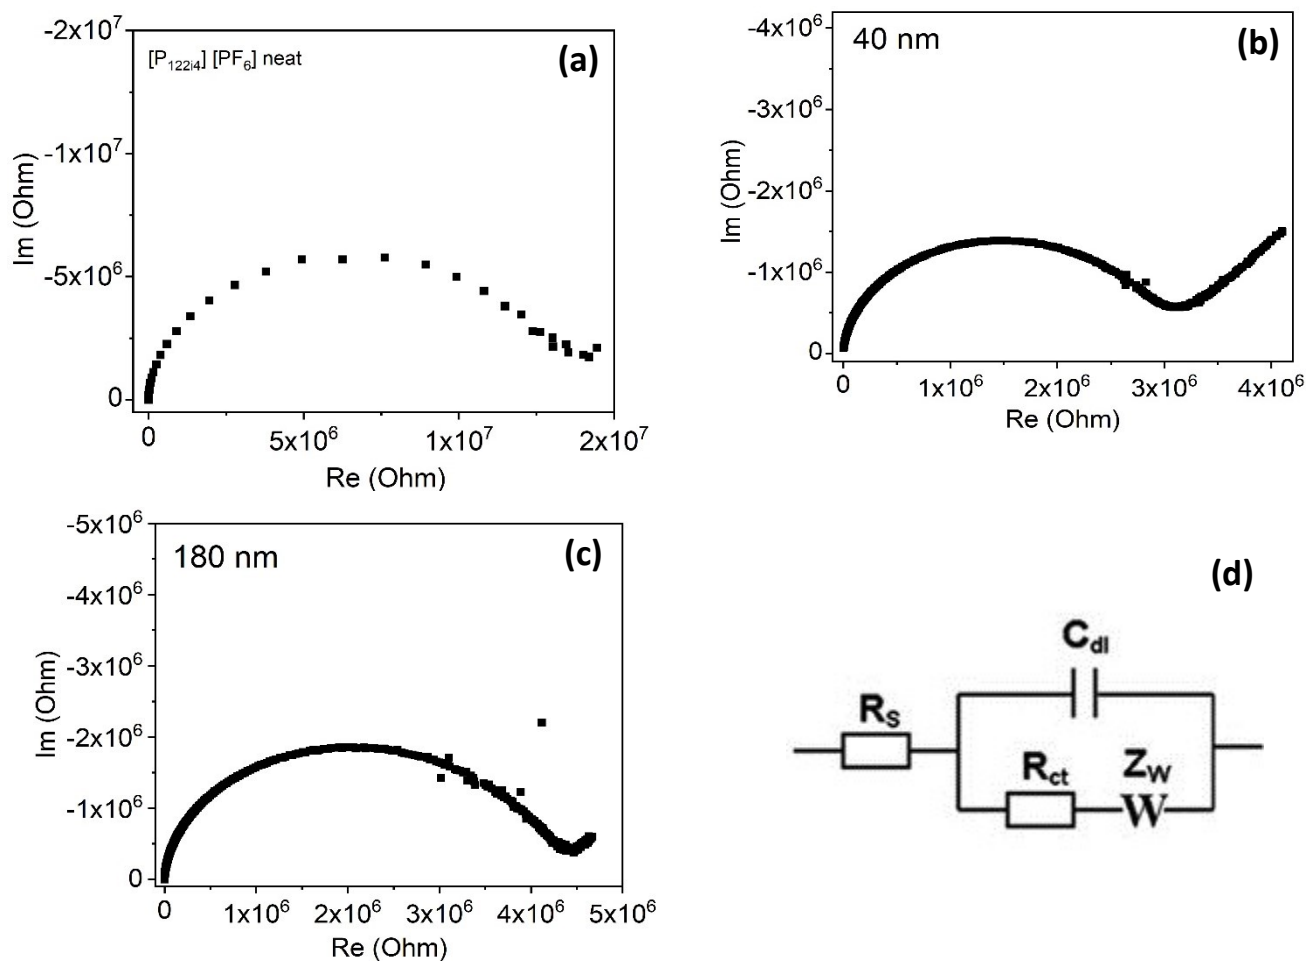

**Fig S1.** Nyquist plots of the impedance spectroscopy data of (a) the neat, (b) 40 nm and (c) 180 nm samples at 30 °C. (d) the equivalent circuit used to fit the experimental data.  $W$  is a so-called Warburg element which accounts for diffusion process.  $R_{ct}$  is the charge transfer resistance,  $R_s$  is the electrode surface resistance and  $C_{dl}$  is the double layer capacitance.
